# Supplementary material for: Hybrid nanovesicles derived from grapes and tomatoes with synergistic antioxidative activity
Source: Royal Society of Chemistry journal article supplement (doi:10.1039/d4bm00591k), 2024-01-01
Supplement: d4bm00591k1.pdf [file d4bm00591k1.pdf]

**Hybrid nanovesicles derived from grapes and tomatoes with synergistic  
antioxidative activity**

Jialin Wang <sup>a</sup>, Fangting Xie <sup>a</sup>, Qiuxia He <sup>a</sup>, Ruilan Gu <sup>a</sup>, Siqin Zhang <sup>a</sup>, Xueqi Su <sup>a</sup>,  
Xueping Pan <sup>a</sup>, Tianyu Zhang <sup>a</sup>, Emad Karrar <sup>a</sup>, Jian Li <sup>a</sup>, Weijing Wu <sup>b, \*</sup> and Chaoxiang  
Chen <sup>a, \*</sup>

<sup>a</sup> Department of Biological Engineering, College of Ocean Food and Biological  
Engineering, Jimei University, Xiamen, Fujian 361021, China

<sup>b</sup> Department of Public Health and Medical Technology, Xiamen Medical College,  
Xiamen, Fujian 361023, China

\* Corresponding author.

E-mail address: [cxchen@jmu.edu.cn](mailto:cxchen@jmu.edu.cn), [wwj@xmmc.edu.cn](mailto:wwj@xmmc.edu.cn)

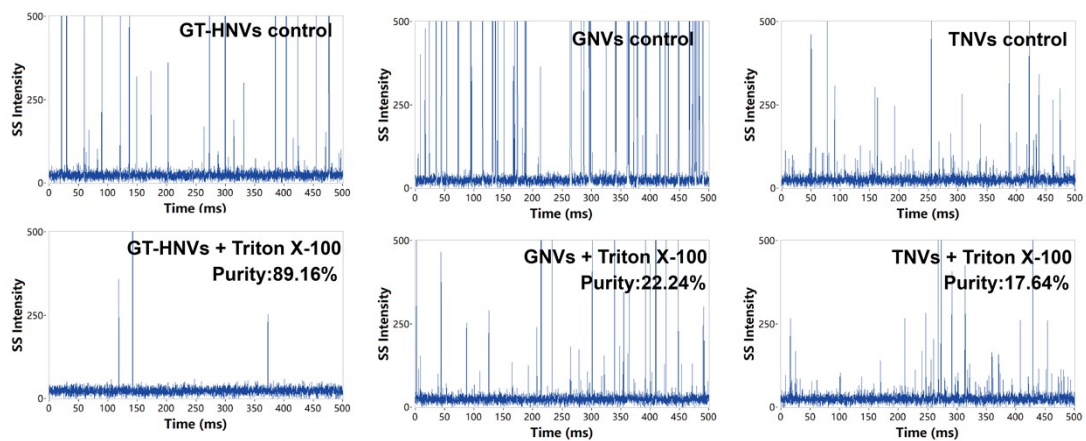

**Figure S1.** Purity assessment of NVs. Particle concentrations of GT-HNVs, GNVs, and TNVs were analyzed using nFCM, before and after lysis with 1% Triton X-100.

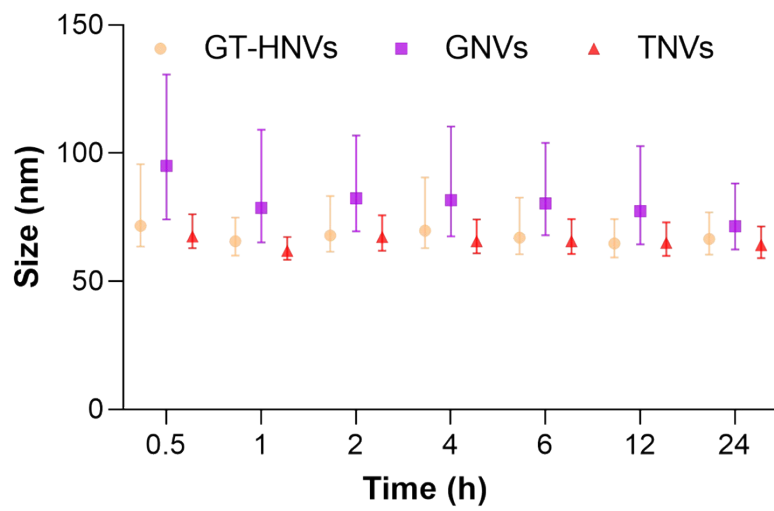

**Figure S2.** Stability assessment of NVs. The size distribution of GT-HNVs, GNVs, and TNVs when incubated in PBS at 37 °C for varying durations was analyzed by nFCM. The results are represented as median values with interquartile ranges.

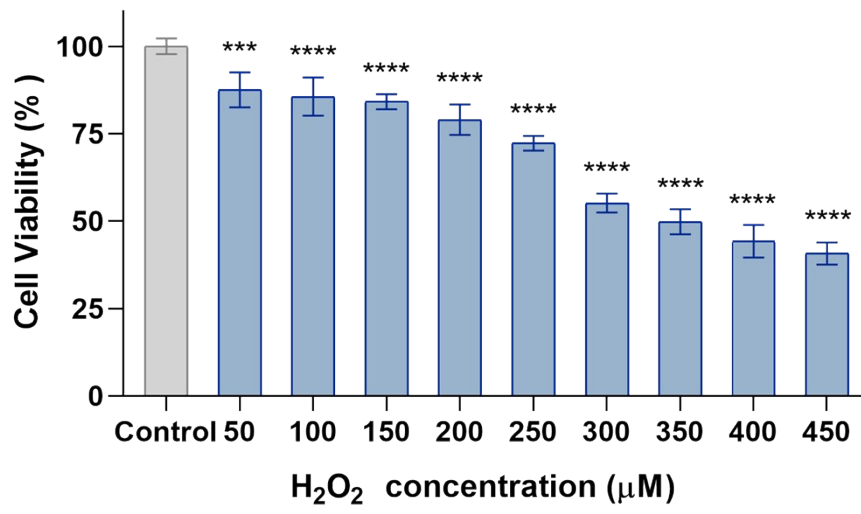

**Figure S3.** Cell viability of L-02 cells treated with different concentrations of H<sub>2</sub>O<sub>2</sub>.

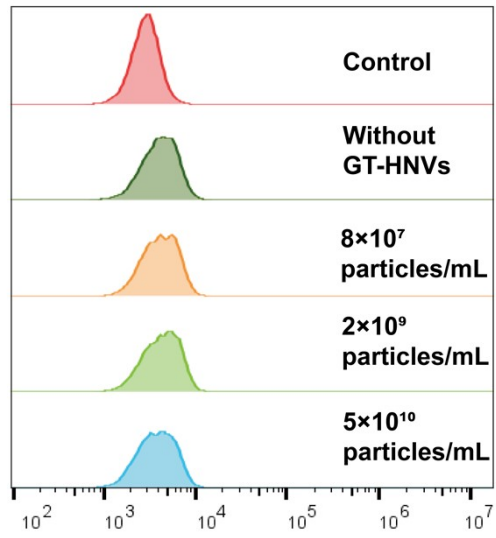

**Figure S4.** FCM analysis of ROS levels in L-02 cells treated with different GT-HNVs concentrations.

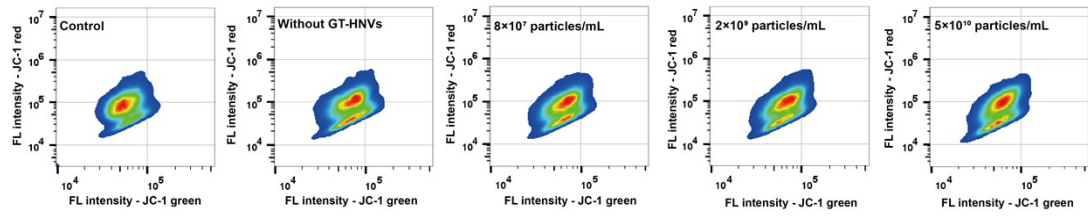

**Figure S5.** FCM analysis of mitochondria membrane potential in L-02 cells treated with different GT-HNVs concentrations.
